# Supplementary material for: Determination of the quality of lipoproteins by Raman spectroscopy in obese and healthy subjects
Source: Royal Society of Chemistry journal article supplement (doi:10.1039/d3an00051f), 2023-01-01
Supplement: d3an00051f1.pdf [file d3an00051f1.pdf]

# Determination of the quality of lipoproteins by Raman Spectroscopy in obese and healthy subjects

Arianna Bonizzi<sup>1</sup>, Flavia Magri<sup>2,3</sup>, Serena Mazzucchelli<sup>1</sup>, Marta Truffi<sup>3</sup>, Andrea Rizzi<sup>4</sup>, Fabio Corsi<sup>1,3</sup>, Roberta Cazzola<sup>1</sup>, Carlo Morasso<sup>3\*</sup>

1) Department of Biomedical and Clinical Sciences, Università degli Studi di Milano, Via G.B. Grassi 74, 20157 Milan, Italy

2) Department of Internal medicine and Medical Therapy, Università degli Studi di Pavia; C.so Strada Nuova, 27100 Pavia, Italy

3) Istituti Clinici Scientifici Maugeri IRCCS, Via Maugeri 4, 27100 Pavia, Italy

4) S.C. Chirurgia Generale Tradate, Ospedale Galmarini di Tradate, ASST dei Sette Laghi, 21049 Tradate, Italy

\*Correspondence: CM, carlo.morasso@icsmaugeri.it; Tel. + 39 0382 592209 ORCID: 0000-0001-9185-0198

## Supplementary Information

| Peak (cm <sup>-1</sup> ) | Range (cm <sup>-1</sup> )         | Assignment                                          | P-value VLDL | P-value LDL | P-value HDL   |
|--------------------------|-----------------------------------|-----------------------------------------------------|--------------|-------------|---------------|
| 700                      | Band 697-703                      | Cholesterol                                         | 0.0249 (*)   | 0.5967      | 0.0397 (*)    |
| 717                      | Band 711-718                      | Phosphatidylcholine                                 | 0.2994       | 0.2654      | 0.0012 (**)   |
| 960                      | Band 955-960                      | Trans C=C                                           | 0.0209 (*)   | 0.0089 (**) | 0,00028 (***) |
| 1271                     | Band 1266-1271                    | C=C lipids                                          | 0.2912       | 0.0021 (**) | 0.0124 (*)    |
| 1300                     | Band 1298 -1303                   | Triglycerides                                       | 0.0673       | 0.0404 (*)  | 0.2106        |
| 1525                     | Band 1520-1525                    | Carotenoids                                         | 0.1784       | 0.0073 (**) | 0.04099 (*)   |
| 1656                     | Band 1655-1660                    | Cis C=C                                             | 0.5784       | 0.0098 (**) | 0.6343        |
| 2851/2930                | Band 2851-2855/<br>Band 2929-2935 | CH <sub>2</sub> Lipids/ CH <sub>2</sub><br>Proteins | 0.2686       | 0.0096 (**) | 0.3181        |

S1: Spectral measurement ranges for peaks analyzed

| Parameters               | OB           | OB + SM      | OB +T2DM     |
|--------------------------|--------------|--------------|--------------|
| Number, sex              | 13 (6F;7M)   | 15 (7F;8M)   | 11 (4F;7M)   |
| Age, years               | 46,4 ± 9,3   | 48,3 ± 11,5  | 50,6 ± 9,3   |
| Weight, Kg               | 115,6 ± 27,5 | 119,6 ± 26,7 | 119,4 ± 19,1 |
| BMI kg/m <sup>2</sup>    | 41,8 ± 7,3   | 40,2 ± 8,7   | 42,3 ± 8,6   |
| Waist circumference, cm  | 121,5 ± 9,9  | 126,8 ± 17,4 | 124,6 ± 17,1 |
| Hips circumference, cm   | 127,1 ± 16,8 | 126,1 ± 17,5 | 134,1 ± 19,3 |
| Total cholesterol, mg/dL | 188,8 ± 33,2 | 188,9 ± 24   | 207,4 ± 22,3 |
| HDL-C, mg/dL             | 52,9 ± 10,1  | 41 ± 7,7     | 44,4 ± 10,2  |
| LDL-C, mg/dL             | 125,2 ± 31,2 | 141,4 ± 27,1 | 143,6 ± 20,4 |
| Triglycerides, mg/dL     | 112,2 ± 38,5 | 151,2 ± 60,8 | 136,1 ± 42,5 |
| Glycemia, mg/dL          | 89 ± 10,4    | 97,8 ± 18,1  | 128,5 ± 23,7 |

S2. Clinical parameters of all subjects recruited
